# Supplementary material
Source: PubMed Central journal article supplement (PMC3369254)
Supplement: ndd-0009-0176-s02.pdf [file ndd-0009-0176-s02.pdf]

**Table S1: ADAScog Error Change Negatively Correlated with fMRI N>R change**

| <b>Region</b>               | <b>Peak X Y Z</b> | <b>Peak T-statistic</b> | <b>Cluster Size (mm<sup>3</sup>)</b> |
|-----------------------------|-------------------|-------------------------|--------------------------------------|
| L. Hippocampus              | -28 -24 -2        | 5.2342                  | 1056                                 |
| R. Superior Occipital Gyrus | 22 -78 20         | 4.3072                  | 704                                  |
| R. Insula                   | 38 -16 14         | 4.2258                  | 712                                  |
| R. Hippocampus              | 26 -32 -6         | 4.0401                  | 608                                  |
| L. Cerebellum Crus I        | -36 -48 -32       | 3.942                   | 672                                  |
| R. Middle Temporal Gyrus    | 58 -48 6          | 3.8834                  | 440                                  |
| R. Cerebellum IV,V          | 18 -46 -18        | 3.8576                  | 608                                  |
| R. Inferior Temporal Gyrus  | 44 2 -42          | 3.7511                  | 792                                  |
| R. Inferior Temporal Gyrus  | 34 6 -44          | 3.0016                  |                                      |

**Table S2: ADAScog Recognition Error Change Negatively Correlated with fMRI N>R Change**

| <b>Region</b>               | <b>Peak X Y Z</b> | <b>Peak T-</b> | <b>Cluster Size</b> |
|-----------------------------|-------------------|----------------|---------------------|
| L. Inferior Parietal Lobule | -56 -34 52        | 3.8079         | 552                 |
| R. Supramarginal Gyrus      | 60 -26 48         | 3.711          | 448                 |
| R. Cerebellum IV,V          | 18 -46 -18        | 3.5788         | 432                 |

**Table S3: FCSRT Free Recall Change Correlated with fMRI N>R Change**

| <b>Region</b>                 | <b>Peak X Y Z</b> | <b>Peak T-statistic</b> | <b>Cluster Size</b> |
|-------------------------------|-------------------|-------------------------|---------------------|
| L. Postcentral Gyrus          | -32 -32 42        | 5.2027                  | 3448                |
| L. Precentral Gyrus           | -30 -22 46        | 4.5145                  |                     |
| L. Inferior Parietal Lobule   | -22 -44 52        | 3.6575                  |                     |
| L. Precuneus                  | 0 -72 54          | 4.3929                  | 1296                |
| L. Precuneus                  | -8 -60 66         | 3.2623                  |                     |
| R. Middle Frontal Gyrus       | 22 50 6           | 4.0776                  | 736                 |
| R. Inferior Parietal Lobe     | 48 -46 58         | 4.0685                  | 752                 |
| R. Postcentral Gyrus          | 50 -32 50         | 3.1029                  |                     |
| R. Postcentral Gyrus          | 32 -28 44         | 4.025                   | 5712                |
| L. Precuneus                  | 0 -42 62          | 3.9418                  |                     |
| R. Middle Cingulate Gyrus     | 8 -38 50          | 3.8617                  |                     |
| L. Paracentral Lobule         | -10 -26 76        | 3.6868                  |                     |
| R. Postcentral Gyrus          | 22 -42 62         | 3.554                   |                     |
| R. Paracentral Lobule         | 14 -34 58         | 3.3392                  |                     |
| R. Postcentral Gyrus          | 30 -32 60         | 3.1435                  |                     |
| L. Posterior Cingulate Cortex | -16 -48 28        | 3.963                   | 840                 |
| L. Insula                     | -34 -10 4         | 3.8829                  | 1056                |
| L. Lingual Gyrus              | -14 -34 -4        | 3.8538                  | 1256                |
| L. Parahippocampus            | -12 -18 -18       | 3.3083                  |                     |
| L. Hippocampus                | -18 -20 -12       | 3.2558                  |                     |
| R. Precentral Gyrus           | 48 -4 30          | 3.8416                  | 1336                |
| R. Middle Frontal Gyrus       | 42 10 44          | 3.2619                  |                     |
| R. Fusiform Gyrus             | 28 -50 -12        | 3.6843                  | 440                 |
| R. Fusiform Gyrus             | 26 -40 -16        | 3.0382                  |                     |
| L. Precuneus                  | -8 -58 18         | 3.3834                  | 512                 |
| L. Postcentral Gyrus          | -62 -14 30        | 3.2757                  | 512                 |
| L. Fusiform Gyrus             | -24 -64 -16       | 3.2105                  | 544                 |
| R. Rolandic Operculum         | 58 8 14           | 3.1467                  | 656                 |
| R. Inferior Frontal Operculum | 46 12 18          | 3.0697                  |                     |

**Table S4: MMSE Change Correlated with fMRI N>R Change**

| <b>Region</b>            | <b>Peak X Y Z</b> | <b>Peak T-statistic</b> | <b>Cluster Size</b> |
|--------------------------|-------------------|-------------------------|---------------------|
| R. Middle Occipital Lobe | 30 -74 26         | 3.7983                  | 504                 |

**Table S5: Post-scan Memory Test-1 Change Correlated with fMRI N>R Change**

| <b>Region</b>                            | <b>Peak X Y Z</b> | <b>Peak T-statistic</b> | <b>Cluster Size</b> |
|------------------------------------------|-------------------|-------------------------|---------------------|
| L. Angular Gyrus                         | -54 -62 24        | 4.9363                  | 1280                |
| L. Middle Temporal Gyrus                 | -58 -58 18        | 4.3518                  |                     |
| R. Brainstem                             | 4 -22 -35         | 4.4772                  | 2760                |
| L. Parahippocampal Gyrus                 | -12 -20 -28       | 4.2584                  |                     |
| R. Cerebellum III                        | 14 -24 -26        | 4.2337                  |                     |
| L. Brainstem                             | -12 -22 -36       | 3.9487                  |                     |
| L. Inferior Frontal Gyrus Orbital        | -38 46 -16        | 3.893                   | 744                 |
| L. Inferior Frontal Gyrus Orbital        | -40 36 -14        | 3.3924                  |                     |
| L. Inferior Frontal Gyrus Orbital        | -34 26 -14        | 3.0615                  |                     |
| R. Precentral Gyrus                      | 46 -18 44         | 3.7864                  | 1128                |
| R. Supplemental Motor Area               | 8 20 48           | 3.77                    | 824                 |
| R. Middle Frontal Gyrus                  | 38 26 30          | 3.7667                  | 600                 |
| R. Inferior Frontal Gyrus Pars Triangula | 38 34 26          | 3.6976                  |                     |
| L. Superior Medial Frontal Gyrus         | -4 52 24          | 3.6831                  | 840                 |
| L. Superior Frontal Gyrus                | -14 52 28         | 3.5253                  |                     |
| L. Superior Medial Frontal Gyrus         | -6 58 14          | 3.0412                  |                     |
| R. Cerebellum X                          | 20 -42 -40        | 3.6173                  | 616                 |
| R. Cerebellum X                          | 18 -34 -40        | 3.1191                  |                     |
| L. Superior Temporal Pole                | -50 8 -20         | 3.6137                  | 1816                |
| L. Superior Temporal Pole                | -42 10 -16        | 3.5969                  |                     |
| L. Insula                                | -30 10 -20        | 3.2639                  |                     |
| L. Putamen                               | -26 -12 10        | 3.4192                  | 680                 |

**Table S6: Post-scan Memory Test-2 Change Correlated with fMRI N>R Change**

| <b>Region</b>                            | <b>Peak X Y Z</b> | <b>Peak T-</b> | <b>Cluster Size</b> |
|------------------------------------------|-------------------|----------------|---------------------|
| L. Cerebellum IV,V                       | -18 -34 -32       | 5.6406         | 48800               |
| R. Fusiform Gyrus                        | 38 -48 -22        | 5.3984         |                     |
| R. Cerebellum IX                         | 16 -56 -34        | 5.3365         |                     |
| R. Cerebellum Crus I                     | 20 -78 -30        | 5.1734         |                     |
| R. Cerebellum IV,V                       | 28 -46 -20        | 4.8686         |                     |
| L. Cerebellum VI                         | -16 -58 -32       | 4.8102         |                     |
| Cerebellum Vermis 1,2                    | 6 -48 -24         | 4.6749         |                     |
| R. Cerebellum XI                         | 8 -44 -40         | 4.6071         |                     |
| L. Cerebellum I,V                        | -12 -48 -28       | 4.5592         |                     |
| R. Cerebellum III                        | 12 -32 -32        | 4.4674         |                     |
| R. Brainstem                             | 4/30/1934         | 4.4302         |                     |
| R. Cerebellum IV,V                       | 22 -28 -32        | 4.402          |                     |
| Cerebellum Vermis 8                      | 4 -68 -42         | 4.3526         |                     |
| L. Fusiform Gyrus                        | -34 -46 -24       | 4.3115         |                     |
| Cerebellum Vermis 8                      | 4 -60 -32         | 4.2449         |                     |
| Cerebellum Vermis 9                      | 4 -60 -40         | 4.2223         |                     |
| R. Cerebellum IV,V                       | 26 -38 -34        | 4.1732         |                     |
| R. Inferior Temporal Gyrus               | 44 -52 -14        | 4.1177         |                     |
| L. Fusiform Gyrus                        | -44 -50 -20       | 4.0289         |                     |
| R. Inferior Occipital Lobe               | 42 -64 -12        | 4.0122         |                     |
| R. Cerebellum Crus I                     | 40 -52 -30        | 4.0022         |                     |
| R. Cerebellum IV,V                       | 16 -46 -22        | 3.9734         |                     |
| R Cerebellum Crus I                      | 40 -52 -38        | 3.935          |                     |
| L. Calcarine Sulcus                      | -20 -70 8         | 3.8588         |                     |
| R. Cerebellum XI                         | 10 -58 -54        | 3.7355         |                     |
| L. Lingual Gyrus                         | -6 -60 2          | 3.7107         |                     |
| L. Cerebellum VIII                       | -28 -46 -42       | 3.6344         |                     |
| L. Inferior Temporal Gyrus               | -40 -34 -16       | 3.6061         |                     |
| L. Lingual Gyrus                         | -10 -72 -6        | 3.3944         |                     |
| L. Lingual Gyrus                         | -20 -74 -4        | 3.1464         |                     |
| R. Cerebellum VI                         | 18 -66 -18        | 3.0998         |                     |
| Cerebellum Vermis 4,5                    | 4 -58 6           | 2.9894         |                     |
| R. Cerebellum VI                         | 20 -76 -18        | 2.9629         |                     |
| L. Inferior Frontal Gyrus Pars Triangula | -48 38 18         | 5.4676         | 2688                |
| L. Inferior Frontal Gyrus Pars Triangula | -60 26 12         | 4.4672         |                     |
| L. Inferior Frontal Gyrus Pars Triangula | -56 36 12         | 4.3411         |                     |
| L. Inferior Frontal Gyrus Pars Triangula | -56 36 -2         | 3.6987         |                     |
| L. Inferior Frontal Gyrus Pars Triangula | -52 20 18         | 2.8942         |                     |
| L. Inferior Parietal Lobule              | -52 -34 44        | 5.3346         | 10336               |
| L. Postcentral Gyrus                     | -48 -36 58        | 4.5166         |                     |
| L. Postcentral Gyrus                     | -38 -32 46        | 4.2922         |                     |
| L. Postcentral Gyrus                     | -56 -16 34        | 3.9571         |                     |
| L. Precentral Gyrus                      | -40 -18 54        | 3.6818         |                     |
| R. Inferior Frontal Gyrus Pars Triangula | 50 24 12          | 5.3226         | 3720                |

|                                          |            |        |      |
|------------------------------------------|------------|--------|------|
| R. Inferior Frontal Gyrus Pars Triangula | 50 20 22   | 3.799  |      |
| R. Inferior Frontal Operculum            | 46 8 20    | 3.2604 |      |
| L. Inferior Frontal Gyrus Pars Triangula | 48 34 24   | 3.0924 |      |
| R. Inferior Orbital Frontal              | -42 28 -10 | 5.0186 | 3976 |
| L. Superior Temporal Pole                | -56 12 -6  | 4.7985 |      |
| L. Superior Temporal Pole                | -50 20 -12 | 4.1147 |      |
| L. Inferior Frontal Gyrus Pars Triangula | -40 26 2   | 3.2693 |      |
| L. Rolandic Operculum                    | -62 10 2   | 3.1338 |      |
| L. Thalamus                              | -10 -28 -4 | 4.6804 | 1536 |
| R. Superior Medial Frontal Gyrus         | 10 52 40   | 4.6101 | 4760 |
| R. Superior Medial Frontal Gyrus         | 6 56 10    | 3.9787 |      |
| L. Anterior Cingulate Cortex             | 2 42 24    | 3.9092 |      |
| L. Superior Medial Frontal Gyrus         | 0 62 16    | 3.7368 |      |
| R. Superior Frontal Gyrus                | 14 38 48   | 3.3737 |      |
| R. Superior Medial Frontal Gyrus         | 4 58 22    | 3.0584 |      |
| R. Inferior Parietal Lobule              | 46 -38 50  | 4.5353 | 5752 |
| R. Postcentral Gyrus                     | 44 -34 60  | 3.8238 |      |
| R. Inferior Frontal Gyrus Orbital        | 42 34 -4   | 4.222  | 2304 |
| R. Middle Frontal Gyrus                  | 38 52 4    | 3.7982 |      |
| L. Lingual Gyrus                         | -28 -60 -2 | 4.0182 | 408  |
| R. Hippocampus                           | 24 -18 -16 | 3.9575 | 1160 |
| L. Precentral Gyrus                      | -42 -2 60  | 3.7402 | 512  |
| L. Superior Occipital Lobe               | -12 -90 8  | 3.6353 | 576  |
| R. Angular Gyrus                         | 32 -66 48  | 3.5841 | 464  |
| R. Paracentral Lobule                    | 8 -34 70   | 3.4127 | 400  |
| L. Middle Temporal Gyrus                 | -62 -12 0  | 3.2771 | 488  |

---
